# Supplementary material for: Prevalence and risk factors of dry eye disease in a British female cohort
Source: HighWire-hosted journal article supplement (doi:10.1136/bjophthalmol-2014-305201), 2014-09-03
Supplement: bjophthalmol-2014-305201_press_release.pdf [file bjophthalmol-2014-305201_press_release.pdf]

10/7/2020

Experiences &amp; Challenges in COVID-19

# Experiences & Challenges in COVID-19

\* Required

## Untitled Section

1. Age \*

---

2. Gender \*

*Mark only one oval.*

Female

Male

3. You are a \*

*Mark only one oval.*

Doctor

Nurse

Field staff

Nursing Aid

Allied Health Professional

Secretarial Staff

Other: \_\_\_\_\_

4. Years of work experience \*

---

10/7/2020

Experiences &amp; Challenges in COVID-19

5. Are you in a leadership role \*

*Mark only one oval.*

Yes

No

6. Are you currently on medication for any chronic illnesses? \*

*Mark only one oval.*

Yes

No

7. What is your predominant emotion during the last 40 days? \*

*Mark only one oval.*

Happy

Sad

Fearful

Anxious

Other: \_\_\_\_\_

8. Can you write some thoughts that came to your mind? \*

---

---

---

---

---

10/7/2020

Experiences &amp; Challenges in COVID-19

9. Have you been experiencing fear in these past 40 days? \*

*Mark only one oval.*

- Almost Never
- Sometimes
- Often
- Almost always

10. Have you been worried in these past 40 days? \*

*Mark only one oval.*

- Almost Never
- Sometimes
- Often
- Almost always

11. Have you been experiencing sleepless nights in these past 40 days? \*

*Mark only one oval.*

- Almost never
- Sometimes
- Often
- Almost always

12. Have you been anxious about things around you in these past 40 days? \*

*Mark only one oval.*

- Almost Never
- Sometimes
- Often
- Almost always

10/7/2020

Experiences &amp; Challenges in COVID-19

13. Are you experiencing stress in your work place after this pandemic? \*

*Mark only one oval.*

- Almost Never
- Sometimes
- Often
- Almost always

14. Are you experiencing stress at your home because this pandemic? \*

*Mark only one oval.*

- Almost Never
- Sometimes
- Often
- Almost always

15. Are you scared that you may die if you continue to work during this pandemic ?

*Mark only one oval.*

- Yes
- No

16. Are you scared to come to work these days ?

*Mark only one oval.*

- Yes
- No
- Occasionally

10/7/2020

Experiences &amp; Challenges in COVID-19

17. Have you ever thought of ending your life because of these unpleasant situations due to pandemic? \*

*Mark only one oval.*

- Almost never
- Sometimes
- Often
- Almost always

18. What do you do to overcome these unpleasant experiences? \*

*Mark only one oval.*

- Talking to friends/Colleagues
- Get involved in favorite hobbies (Reading/Cooking/Gardening/playing)
- Pray or spend time in religious activities
- Spend time with family
- Other: \_\_\_\_\_

19. Can you describe some of your positive thoughts?

\_\_\_\_\_

20. Can you write two reasons you are grateful for?

\_\_\_\_\_

21. Can you write two reasons (corona related) which is causing most stress in the last 40 days

\_\_\_\_\_

---

This content is neither created nor endorsed by Google.

10/7/2020

Experiences & Challenges in COVID-19

Google Forms
